# Supplementary material for: Development and Characterization of a Novel Wheat–Tetraploid Thinopyrum elongatum 6E (6D) Disomic Substitution Line with Stripe Rust Resistance at the Adult Stage
Source: MDPI journal article supplement (doi:10.3390/plants12122311), 2023-06-14
Supplement: s1 [file s1]

**Table S1.** Wheat relatives used in this study.

| Species                           | Accession | Chromosome numbers | Genome                        |
|-----------------------------------|-----------|--------------------|-------------------------------|
| <i>Triticum monococcum</i>        | PI427866  | 14                 | A <sup>m</sup>                |
| <i>Triticum speltoides</i>        | PI542251  | 14                 | S                             |
| <i>Triticum tauschii</i>          | AS84      | 14                 | D                             |
| <i>Thinopyrum elongatum</i>       | PI531718  | 14                 | E                             |
| <i>Thinopyrum elongatum</i>       | PI531750  | 28                 | E                             |
| <i>Thinopyrum ponticum</i>        | PI531737  | 70                 | EEESTt                        |
| <i>Thinopyrum bessarabicum</i>    | W6-10232  | 14                 | E <sup>b</sup> E <sup>b</sup> |
| <i>Pseudoroegneria libanotica</i> | PI1228391 | 14                 | St                            |
| <i>Dasypyrum villosum</i>         | PI251477  | 14                 | V                             |
| <i>Hordeum bogdanii</i>           | Y1819     | 14                 | H                             |
| <i>Agropyron cristatum</i>        | PI610892  | 14                 | P                             |
| <i>Secale cereale</i>             | QL        | 14                 | R                             |
| <i>Psathyrostachys huashanica</i> | ZY3156    | 14                 | Ns                            |
| <i>Trichopyrum caespitosum</i>    | PI634264  | 14                 | StE                           |
| <i>Psammopyrum athericum</i>      | PI531744  | 42                 | StEP                          |
