# Supplementary material for: Development and Characterization of a Novel Wheat–Tetraploid Thinopyrum elongatum 6E (6D) Disomic Substitution Line with Stripe Rust Resistance at the Adult Stage
Source: MDPI journal article supplement (doi:10.3390/plants12122311), 2023-06-14
Supplement: s1 [file s1]

**Table S4.** The avirulence(A) /virulence(V) formula of the *Pst* races used in the present study [58].

| Race name | Virulence or avirulence formula on <i>Yr</i> genes                                                                                                                                                                                                  |
|-----------|-----------------------------------------------------------------------------------------------------------------------------------------------------------------------------------------------------------------------------------------------------|
| CYR32     | V: <i>Yr1, Yr2, Yr3, Yr4, Yr6, Yr7, Yr8, Yr9, Yr11, Yr12, Yr13, Yr14, Yr16, Yr17, Yr18, Yr25, Yr27, Yr28, Yr29, Yr30, Yr31, Yr32, Yr43, Yr44, YrExp2, YrSp, Yr76, YrV23, YrA</i><br>A: <i>Yr5, Yr10, Yr15, Yr19, Yr24, Yr26, Yr32, YrTr1, YrTye</i> |
| CYR33     | V: <i>Yr1, Yr2, Yr3, Yr4, Yr6, Yr7, Yr8, Yr9, Yr11, Yr12, Yr13, Yr14, Yr16, Yr17, Yr18, Yr25, Yr27, Yr28, Yr29, Yr30, Yr31, Yr32, Yr43, Yr44, YrExp2, YrA, YrSk, YrSp</i><br>A: <i>Yr5, Yr10, Yr15, Yr19, Yr24, Yr26, Yr32, YrTr1</i>               |
| CYR34     | V: <i>Yr1, Yr2, Yr3, Yr4, Yr6, Yr7, Yr8, Yr9, Yr10, Yr11, Yr12, Yr13, Yr14, Yr16, Yr17, Yr18, Yr19, Yr24, Yr25, Yr26, Yr27, Yr28, Yr29, Yr30, Yr31, Yr32, Yr43, Yr44, YrExp2, YrA, YrSk, YrSp, YrTye</i><br>A: <i>Yr5, Yr15, Yr32, YrTr1</i>        |
| G22–14    | V: <i>Yr1, Yr2, Yr3, Yr4, Yr6, Yr7, Yr8, Yr9, Yr10, Yr11, Yr12, Yr13, Yr14, Yr16, Yr19, Yr20, Yr24, Yr26</i><br>A: <i>Yr3b, Yr4b, Yr5, Yr15, Yr17, Yr18</i>                                                                                         |
| Su11–4    | V: <i>Yr1, Yr2, Yr3, Yr4, Yr6, Yr7, Yr8, Yr9, Yr13, Yr14, Yr16, Yr18, Yr28, Yr29, Yr31, Yr43, Yr44, YrExp2</i><br>A: <i>Yr5, Yr10, Yr11, Yr12, Yr15, Yr17, Yr19, Yr24, Yr26, Yr27, Yr32, YrSp, YrTr1</i>                                            |
| Su11–5    | V: <i>Yr1, Yr2, Yr3, Yr4, Yr6, Yr7, Yr8, Yr9, Yr11, Yr14, Yr16, Yr18, Yr28, Yr29, Yr31, Yr43, Yr44, YrExp2, YrSp</i><br>A: <i>Yr5, Yr10, Yr12, Yr13, Yr15, Yr17, Yr19, Yr24, Yr26, Yr27, Yr32, YrTr1</i>                                            |
| Su11–7    | V: <i>Yr1, Yr2, Yr3, Yr4, Yr6, Yr7, Yr8, Yr9, Yr11, Yr12, Yr14, Yr16, Yr17, Yr18, Yr28, Yr29, Yr31, Yr43, Yr44, YrExp2, YrSp</i><br>A: <i>Yr5, Yr10, Yr13, Yr15, Yr17, Yr19, Yr24, Yr26, Yr27, Yr32, YrTr1</i>                                      |
