# Supplementary material for: Development and Characterization of a Novel Wheat–Tetraploid Thinopyrum elongatum 6E (6D) Disomic Substitution Line with Stripe Rust Resistance at the Adult Stage
Source: MDPI journal article supplement (doi:10.3390/plants12122311), 2023-06-14
Supplement: s1 [file s1]

**Table S2.** PCR amplification results of tetraploid *Th. elongatum* molecular markers.

| Specific Markers | DNA Sequences of the Special Primers (5'-3') |                        | Fragments Size (bp) | Annealing Temperatures (°C) | CS | SM482 | SM921 | 8801 | PI531718 (E) | PI531750 (EE) | 1E (1D) | 2E (2A) | 3E (3D) | 4E (4D) | 5E (5D) | 6E (6D) | 7E (7D) |
|------------------|----------------------------------------------|------------------------|---------------------|-----------------------------|----|-------|-------|------|--------------|---------------|---------|---------|---------|---------|---------|---------|---------|
|                  | Forward                                      | Reverse                |                     |                             |    |       |       |      |              |               |         |         |         |         |         |         |         |
| <i>chr6E-2</i>   | CAAATCAGCATCCAATCAGC                         | CGCTCGAGTTGCTAGTAGGC   | 267                 | 61                          | 0  | 0     | 0     | 1    | 1            | 1             | 0       | 0       | 0       | 0       | 0       | 1       | 0       |
| <i>chr6E-3</i>   | GGCAGAGTGGAAATCCAAAT                         | ATTGGTGTACGGACCTCAC    | 242                 | 58                          | 0  | 0     | 0     | 1    | 1            | 1             | 0       | 0       | 0       | 0       | 0       | 1       | 0       |
| <i>chr6E-5</i>   | CTTGTGCTTGCCATGTGATT                         | TGACACATTGTTGTACGGGAA  | 196                 | 58                          | 0  | 0     | 0     | 1    | 1            | 1             | 0       | 0       | 0       | 0       | 0       | 1       | 0       |
| <i>chr6E-7</i>   | GTCGCCAGAGTCTCTTCGTT                         | CCTGGGAGAGCTCAGTTGAC   | 261                 | 62                          | 0  | 0     | 0     | 1    | 1            | 1             | 0       | 0       | 0       | 0       | 0       | 1       | 0       |
| <i>chr6E-8</i>   | AGTTCAAGTGCGGATAACGC                         | ATGCACTTGTGAGTGGAACG   | 197                 | 61                          | 0  | 0     | 0     | 1    | 1            | 1             | 0       | 0       | 0       | 0       | 0       | 1       | 0       |
| <i>chr6E-10</i>  | ACGAACCCTAAGAAAGGGGA                         | GGCATGTTGGACTGTAGCCT   | 217                 | 60                          | 0  | 0     | 0     | 1    | 1            | 1             | 0       | 0       | 0       | 0       | 0       | 1       | 0       |
| <i>chr6E-13</i>  | GCCCAGACATGGCCTAGTAA                         | CACGGCCCGTTTACTTTTT    | 163                 | 62                          | 0  | 0     | 0     | 1    | 1            | 1             | 0       | 0       | 0       | 0       | 0       | 1       | 0       |
| <i>chr6E-14</i>  | TTTTTCTCAGGCCCATGTGT                         | CTTTACCAAATCAGCCCCCT   | 241                 | 58                          | 0  | 0     | 0     | 1    | 1            | 1             | 0       | 0       | 0       | 0       | 0       | 1       | 0       |
| <i>chr6E-16</i>  | GCTCATCAATTTTGAAGAAAAGG                      | CCGGTGAACCTTGTTGAAAT   | 191                 | 56                          | 0  | 0     | 0     | 1    | 1            | 1             | 0       | 0       | 0       | 0       | 0       | 1       | 0       |
| <i>chr6E-17</i>  | CCTTCTCCCTTTCTCTGCT                          | CCACCACACATCTCTCCA     | 187                 | 59                          | 0  | 0     | 0     | 1    | 1            | 1             | 0       | 0       | 0       | 0       | 0       | 1       | 0       |
| <i>chr6E-21</i>  | GCCATAGGACAGACTGGAGC                         | CCCTCTCATCCCGTATCAA    | 194                 | 58                          | 0  | 0     | 0     | 1    | 1            | 1             | 0       | 0       | 0       | 0       | 0       | 1       | 0       |
| <i>chr6E-23</i>  | ACCTGGGCCATGTTAGTCTG                         | TCAGTCGATGACCACTTTGC   | 109                 | 59                          | 0  | 0     | 0     | 1    | 1            | 1             | 0       | 0       | 0       | 0       | 0       | 1       | 0       |
| <i>chr6E-24</i>  | GAGCCCTCTTCTGTGTGAC                          | ATCAACAGGTTTCCTGGACG   | 219                 | 59                          | 0  | 0     | 0     | 1    | 1            | 1             | 0       | 0       | 0       | 0       | 0       | 1       | 0       |
| <i>chr6E-25</i>  | TTAACCCCTGCAGAGCACTT                         | TTTGATGCATGTAAACACCGA  | 138                 | 57                          | 0  | 0     | 0     | 1    | 1            | 1             | 0       | 0       | 0       | 0       | 0       | 1       | 0       |
| <i>chr6E-26</i>  | ACAGAACCGCGGGTTAATA                          | AAAACACACCACGACTGCAA   | 143                 | 57                          | 0  | 0     | 0     | 1    | 1            | 1             | 0       | 0       | 0       | 0       | 0       | 1       | 0       |
| <i>chr6E-27</i>  | AAGTGGAGCGGCACATTAC                          | CGTTGAACATGTTTCCAATACG | 276                 | 57                          | 0  | 0     | 0     | 1    | 1            | 1             | 0       | 0       | 0       | 0       | 0       | 1       | 0       |
| <i>chr6E-28</i>  | TCACCTACTCGTCTTCGGCT                         | AGATGCTGGGCTCCTACTGA   | 280                 | 61                          | 0  | 0     | 0     | 1    | 1            | 1             | 0       | 0       | 0       | 0       | 0       | 1       | 0       |
| <i>chr6E-31</i>  | GCCGTTAGATCTGTGTTCC                          | TAGAGAGAGGCCGTGCATTT   | 202                 | 59                          | 0  | 0     | 0     | 1    | 1            | 1             | 0       | 0       | 0       | 0       | 0       | 1       | 0       |
| <i>chr6E-36</i>  | TTCGCAAACAGAAATGGAGA                         | TGTGTGTCTTCGGTTATCGC   | 225                 | 60                          | 0  | 0     | 0     | 1    | 1            | 1             | 0       | 0       | 0       | 0       | 0       | 1       | 0       |
| <i>chr6E-37</i>  | ACCACATCCCGCATATAAAA                         | CTTGTCTCATCCTTCACGCA   | 214                 | 57                          | 0  | 0     | 0     | 1    | 1            | 1             | 0       | 0       | 0       | 0       | 0       | 1       | 0       |
| <i>chr6E-38</i>  | AGGAGGGGCATCACGTTAC                          | CCCTCCATGTCTCATCATC    | 180                 | 57                          | 0  | 0     | 0     | 1    | 1            | 1             | 0       | 0       | 0       | 0       | 0       | 1       | 0       |
| <i>chr6E-40</i>  | GTCGCTTACCTTGTTCCCT                          | ATATTTTGGGCGAGTGGAG    | 142                 | 57                          | 0  | 0     | 0     | 1    | 1            | 1             | 0       | 0       | 0       | 0       | 0       | 1       | 0       |
| <i>chr6E-42</i>  | TATTGAGCAACCCCGTTTTTC                        | TACTCCATCACGTCCCCTTC   | 187                 | 57                          | 0  | 0     | 0     | 1    | 1            | 1             | 0       | 0       | 0       | 0       | 0       | 1       | 0       |
| <i>chr6E-43</i>  | TCTGACCTTAAGCGCCAAGT                         | AAGGTACCCTACCGCCAAC    | 101                 | 60                          | 0  | 0     | 0     | 1    | 1            | 1             | 0       | 0       | 0       | 0       | 0       | 1       | 0       |
| <i>chr6E-45</i>  | TCTGTGCTGAAACTCGCACT                         | ACAAGTGAAACAACCCCTGGC  | 252                 | 59                          | 0  | 0     | 0     | 1    | 1            | 1             | 0       | 0       | 0       | 0       | 0       | 1       | 0       |
| <i>chr6E-46</i>  | CCGAACCTTGTTATCGTGGGT                        | GGCGCCAAATAAGGATTACC   | 193                 | 57                          | 0  | 0     | 0     | 1    | 1            | 1             | 0       | 0       | 0       | 0       | 0       | 1       | 0       |
| <i>chr6E-47</i>  | CTGGCTACGGCAGATGTGTA                         | AAATTACGGGATTGTACGG    | 235                 | 57                          | 0  | 0     | 0     | 1    | 1            | 1             | 0       | 0       | 0       | 0       | 0       | 1       | 0       |
| <i>chr6E-48</i>  | GACACCAGCCTAACCCEAAA                         | CGCGCATTTAAAAATGGTTT   | 239                 | 57                          | 0  | 0     | 0     | 1    | 1            | 1             | 0       | 0       | 0       | 0       | 0       | 1       | 0       |
| <i>chr6E-49</i>  | ACGAGAGATTGGTGTGCGAG                         | GGGCGCAAAATTTTAAAGACA  | 177                 | 57                          | 0  | 0     | 0     | 1    | 1            | 1             | 0       | 0       | 0       | 0       | 0       | 1       | 0       |
| <i>chr6E-50</i>  | ATACATGCCACCAACCAAT                          | TCCCAACGGCTAGACTGACT   | 136                 | 59                          | 0  | 0     | 0     | 1    | 1            | 1             | 0       | 0       | 0       | 0       | 0       | 1       | 0       |
| <i>chr6E-51</i>  | CAGCGGTATTAATTGGCCTT                         | TGTGTCTTTGACGATTGGGA   | 175                 | 58                          | 0  | 0     | 0     | 1    | 1            | 1             | 0       | 0       | 0       | 0       | 0       | 1       | 0       |
| <i>chr6E-59</i>  | CATGCCCTGGCTAACTGTTT                         | CTTCACATCCCAACACACG    | 136                 | 59                          | 0  | 0     | 0     | 1    | 1            | 1             | 0       | 0       | 0       | 0       | 0       | 1       | 0       |
| <i>chr6E-60</i>  | AGCCTGCGAGAGAAGAAGTG                         | CGCCGTTACAGTATCCTTTGT  | 122                 | 59                          | 0  | 0     | 0     | 1    | 1            | 1             | 0       | 0       | 0       | 0       | 0       | 1       | 0       |
