# Supplementary material for: Development and Characterization of a Novel Wheat–Tetraploid Thinopyrum elongatum 6E (6D) Disomic Substitution Line with Stripe Rust Resistance at the Adult Stage
Source: MDPI journal article supplement (doi:10.3390/plants12122311), 2023-06-14
Supplement: s1 [file s1]

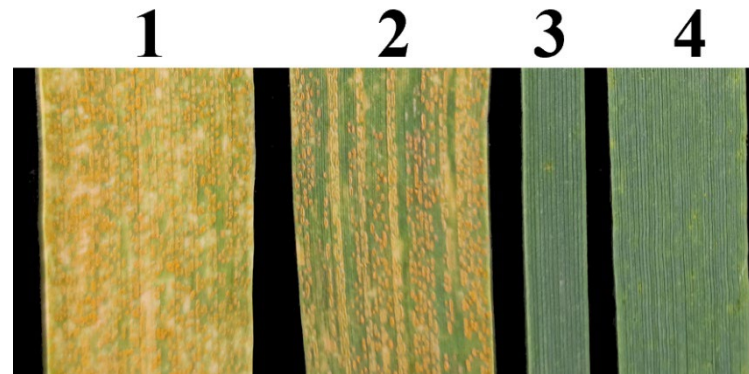

**Figure S1.** Stripe rust responses of 8801 and the controls at adult plant. 1, SY95-71; 2, *T. durum*; 3, tetraploid *Th. elongatum*; 4, 8801.
