# Supplementary material for: Development and Characterization of a Novel Wheat–Tetraploid Thinopyrum elongatum 6E (6D) Disomic Substitution Line with Stripe Rust Resistance at the Adult Stage
Source: MDPI journal article supplement (doi:10.3390/plants12122311), 2023-06-14
Supplement: s1 [file s1]

**Table S3.** Specific amplification of 6E chromosome markers in wheat-related species.

| Specific Markers | PI427866 (A) | PI542251 (B) | AS84 (D) | PI531718 (E) | PI531750 (EE) | PI531737 (EEESStSt) | W6-10232 (E <sup>b</sup> ) | Y1819 (H) | PI610892 (P) | QL (R) | PI251477 (V) | ZY3156 (Ns) | PI228391 (St) | PI634264 (StE) | PI531744 (StEP) |
|------------------|--------------|--------------|----------|--------------|---------------|---------------------|----------------------------|-----------|--------------|--------|--------------|-------------|---------------|----------------|-----------------|
| <i>chr6E-2</i>   | 0            | 0            | 0        | 1            | 1             | 1                   | 1                          | 0         | 1            | 0      | 0            | 0           | 0             | 1              | 1               |
| <i>chr6E-3</i>   | 0            | 0            | 0        | 1            | 1             | 1                   | 0                          | 0         | 0            | 0      | 0            | 0           | 0             | 1              | 0               |
| <i>chr6E-5</i>   | 0            | 0            | 0        | 1            | 1             | 1                   | 0                          | 0         | 0            | 0      | 0            | 0           | 0             | 0              | 0               |
| <i>chr6E-7</i>   | 0            | 0            | 0        | 1            | 1             | 1                   | 1                          | 0         | 0            | 0      | 0            | 0           | 0             | 0              | 0               |
| <i>chr6E-8</i>   | 0            | 0            | 0        | 1            | 1             | 0                   | 0                          | 0         | 0            | 0      | 0            | 0           | 1             | 0              | 0               |
| <i>chr6E-10</i>  | 0            | 0            | 0        | 1            | 1             | 1                   | 0                          | 0         | 0            | 0      | 0            | 0           | 0             | 0              | 1               |
| <i>chr6E-13</i>  | 0            | 0            | 0        | 1            | 1             | 0                   | 0                          | 0         | 0            | 0      | 0            | 0           | 0             | 0              | 0               |
| <i>chr6E-14</i>  | 0            | 0            | 0        | 1            | 1             | 0                   | 0                          | 0         | 0            | 0      | 0            | 0           | 0             | 0              | 0               |
| <i>chr6E-16</i>  | 0            | 0            | 0        | 1            | 1             | 0                   | 1                          | 0         | 0            | 0      | 0            | 0           | 0             | 0              | 0               |
| <i>chr6E-17</i>  | 0            | 0            | 0        | 1            | 1             | 0                   | 0                          | 0         | 0            | 0      | 0            | 0           | 0             | 0              | 0               |
| <i>chr6E-21</i>  | 0            | 0            | 0        | 1            | 1             | 0                   | 0                          | 0         | 0            | 0      | 0            | 0           | 0             | 0              | 0               |
| <i>chr6E-23</i>  | 0            | 0            | 0        | 1            | 1             | 0                   | 0                          | 0         | 0            | 0      | 0            | 0           | 0             | 0              | 1               |
| <i>chr6E-24</i>  | 0            | 0            | 0        | 1            | 1             | 0                   | 0                          | 0         | 0            | 0      | 0            | 0           | 0             | 0              | 0               |
| <i>chr6E-25</i>  | 0            | 0            | 0        | 1            | 1             | 1                   | 0                          | 0         | 0            | 0      | 0            | 0           | 0             | 0              | 0               |
| <i>chr6E-26</i>  | 0            | 0            | 0        | 1            | 1             | 0                   | 0                          | 0         | 0            | 0      | 0            | 0           | 0             | 0              | 1               |
| <i>chr6E-27</i>  | 0            | 0            | 0        | 1            | 1             | 0                   | 0                          | 0         | 1            | 0      | 0            | 0           | 0             | 0              | 0               |
| <i>chr6E-28</i>  | 0            | 0            | 0        | 1            | 1             | 0                   | 0                          | 0         | 0            | 0      | 0            | 0           | 0             | 0              | 0               |
| <i>chr6E-31</i>  | 0            | 0            | 0        | 1            | 1             | 0                   | 0                          | 0         | 0            | 0      | 0            | 0           | 0             | 0              | 1               |
| <i>chr6E-36</i>  | 0            | 0            | 0        | 1            | 1             | 0                   | 0                          | 0         | 0            | 0      | 0            | 0           | 0             | 0              | 0               |
| <i>chr6E-37</i>  | 0            | 0            | 0        | 1            | 1             | 0                   | 0                          | 0         | 0            | 0      | 0            | 0           | 0             | 0              | 1               |
| <i>chr6E-38</i>  | 0            | 0            | 0        | 1            | 1             | 0                   | 0                          | 0         | 0            | 0      | 0            | 0           | 0             | 0              | 1               |
| <i>chr6E-40</i>  | 0            | 0            | 0        | 1            | 1             | 0                   | 1                          | 0         | 0            | 0      | 0            | 0           | 0             | 0              | 1               |
| <i>chr6E-42</i>  | 0            | 0            | 0        | 1            | 1             | 1                   | 1                          | 0         | 0            | 0      | 0            | 0           | 0             | 0              | 0               |
| <i>chr6E-43</i>  | 0            | 0            | 0        | 1            | 1             | 0                   | 0                          | 0         | 0            | 0      | 0            | 0           | 0             | 0              | 1               |
| <i>chr6E-45</i>  | 0            | 0            | 0        | 1            | 1             | 1                   | 0                          | 0         | 0            | 0      | 0            | 0           | 0             | 0              | 1               |
| <i>chr6E-46</i>  | 0            | 0            | 0        | 1            | 1             | 0                   | 0                          | 0         | 0            | 0      | 0            | 0           | 0             | 0              | 0               |
| <i>chr6E-47</i>  | 0            | 0            | 0        | 1            | 1             | 0                   | 0                          | 0         | 0            | 0      | 0            | 0           | 0             | 0              | 0               |
| <i>chr6E-48</i>  | 0            | 0            | 0        | 1            | 1             | 1                   | 0                          | 0         | 0            | 0      | 0            | 0           | 0             | 0              | 0               |
| <i>chr6E-49</i>  | 0            | 0            | 0        | 1            | 1             | 0                   | 0                          | 0         | 0            | 0      | 0            | 0           | 0             | 0              | 1               |
| <i>chr6E-50</i>  | 0            | 0            | 0        | 1            | 1             | 1                   | 1                          | 0         | 0            | 0      | 0            | 0           | 0             | 0              | 0               |
| <i>chr6E-51</i>  | 0            | 0            | 0        | 1            | 1             | 1                   | 0                          | 0         | 0            | 0      | 0            | 0           | 0             | 0              | 1               |
| <i>chr6E-59</i>  | 0            | 0            | 0        | 1            | 1             | 0                   | 0                          | 0         | 0            | 0      | 0            | 0           | 0             | 0              | 0               |
| <i>chr6E-60</i>  | 0            | 0            | 0        | 1            | 1             | 0                   | 1                          | 0         | 0            | 0      | 0            | 0           | 0             | 0              | 1               |
